# Supplementary material for: First use of Simulation in Therapeutic Patient Education (S-TPE) in adults with diabetes: a pilot study
Source: HighWire-hosted journal article supplement (doi:10.1136/bmjopen-2021-049454), 2022-02-01

### Supplementary Figure 1 : Design of S-TPE intervention

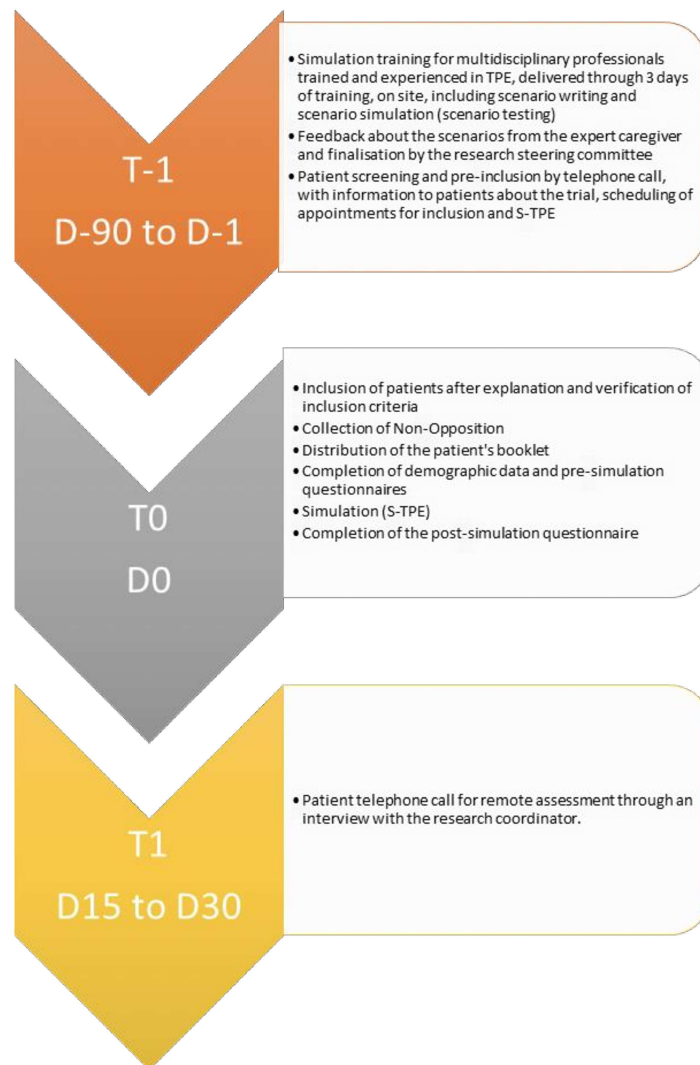

Supplement: bmjopen-2021-049454supp002_data_supplement.pdf [file bmjopen-2021-049454supp002_data_supplement.pdf]
